# Supplementary material for: MoS2 and CdMoS4 nanostructure-based UV light photodetectors
Source: Royal Society of Chemistry journal article supplement (doi:10.1039/d1na00326g), 2021-01-01
Supplement: d1na00326g1.pdf [file d1na00326g1.pdf]

## Supplementary Material

### MoS<sub>2</sub> and CdMoS<sub>4</sub> nanostructures based UV light Photodetector

Mahendra S. Pawar,<sup>a,b</sup> Sunil R. Kadam,<sup>c</sup> Bharat B. Kale,<sup>\*c</sup> Dattatray J. Late<sup>\*,a,b,d</sup>

Fig. S1

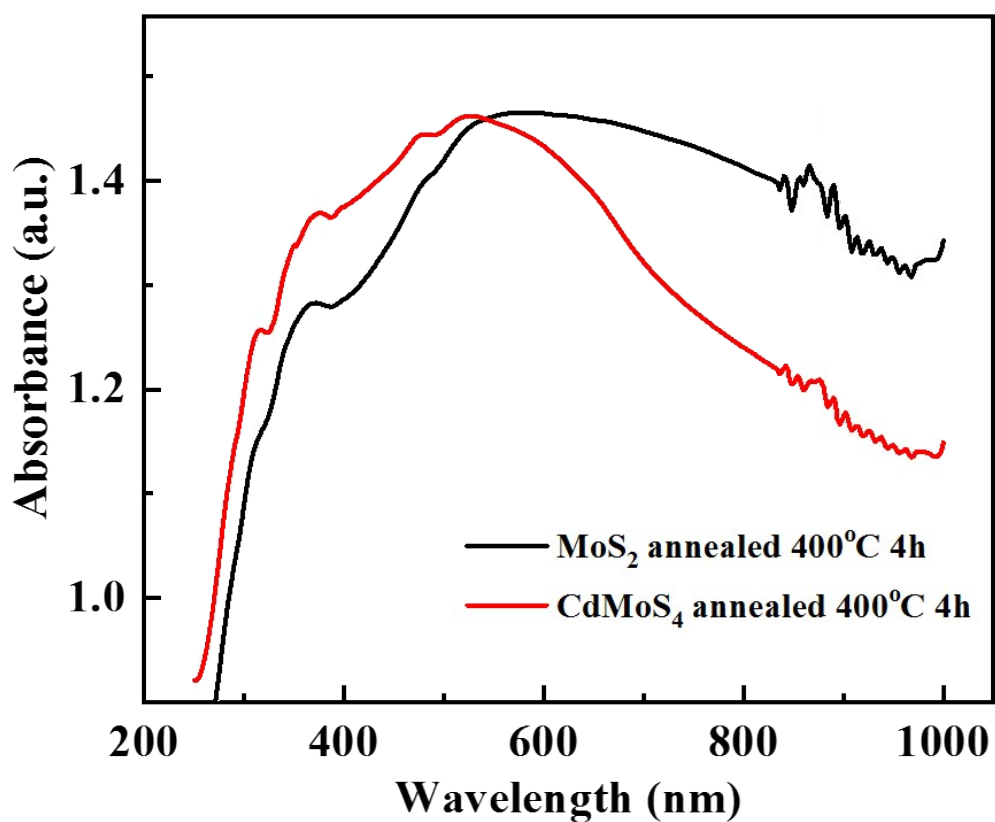

Fig. S1 UV-Visible spectra for MoS<sub>2</sub> (Black color) and CdMoS<sub>4</sub> (Red color) samples annealed at 400°C.

**Fig. S2**

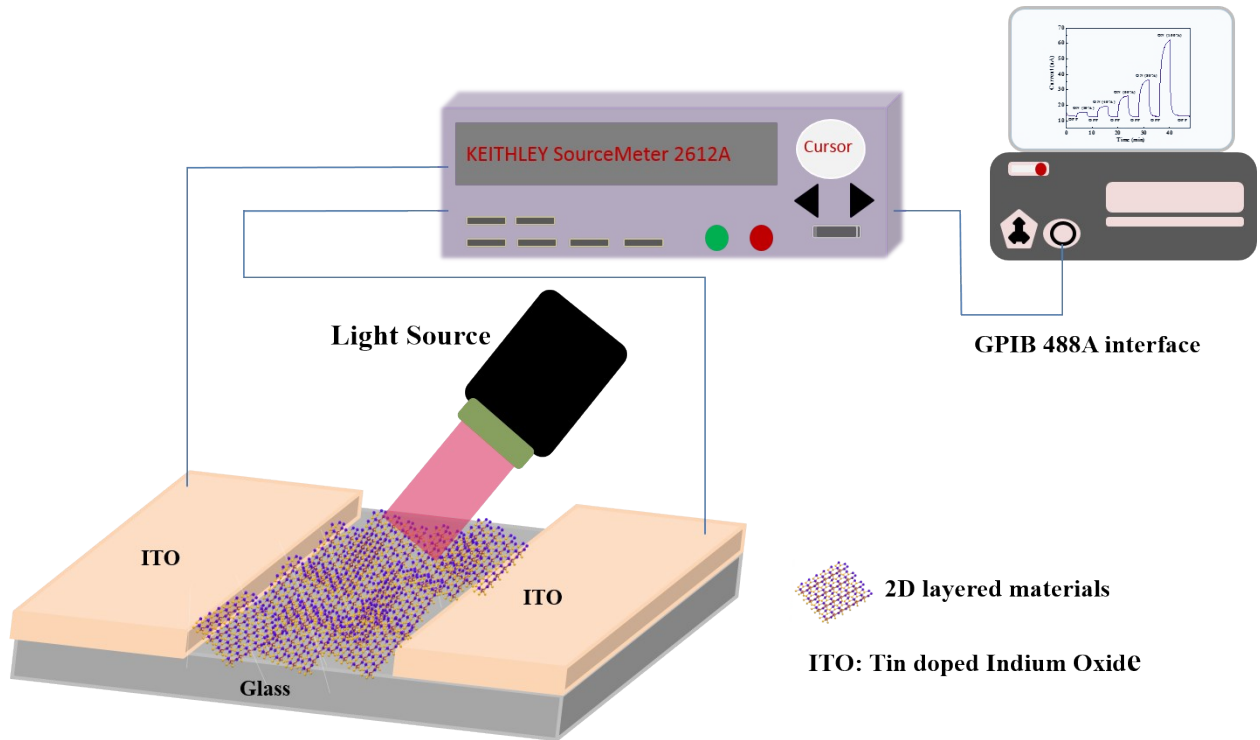

**Fig. S2** Schematic of the Experimental setup for measurement of UV light Photodetector.

**Fig. S3**

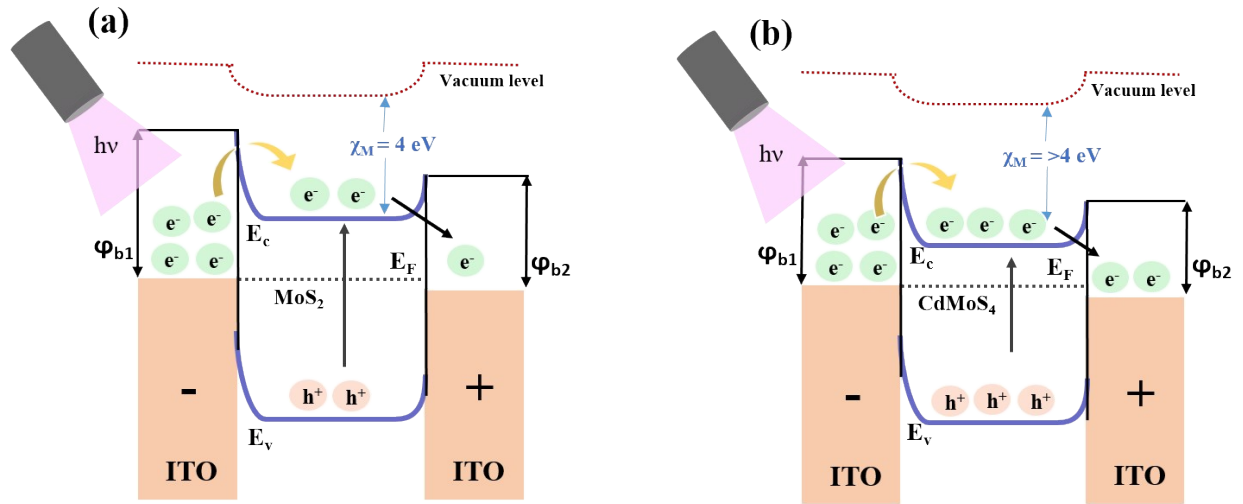

**Fig. S3** Energy band diagram for (a) MoS<sub>2</sub> and (b) CdMoS<sub>4</sub> using ITO electrode under biasing and light illumination conditions.

Photodetector mechanism under biasing and light illuminations using ITO electrode: The fig.S4 shows the energy band diagram for the Schottky barrier (ITO/MoS<sub>2</sub>) and (ITO/CdMoS<sub>4</sub>) in the photodetector device under biasing and light illumination conditions. The parameters such as  $\phi_b$  (4.7 eV),  $\chi_M$  (4 eV),  $\phi_{b1}$  and  $\phi_{b2}$  are the workfunction of the ITO electrode, electron affinity of the MoS<sub>2</sub>, schottky barrier height at the ITO/MoS<sub>2</sub> and ITO/CdMoS<sub>4</sub> respectively.<sup>1</sup> When light falls on the device under biasing conditions electrons from the ITO layer will start crossing the schottky barrier ( $\phi_{b1}$ ). Once the barrier is crossed due to thermionic field emission it easily crosses the lower schottky barrier ( $\phi_{b2}$ ), further these electrons are collected at the positively biased ITO electrode. In case of CdMoS<sub>4</sub> the barrier height is lower compared to MoS<sub>2</sub> hence it results in the generation and collection of charge carriers. This gives rise to enhancement in the photocurrent value also the photoresponsivity.

Fig. S4

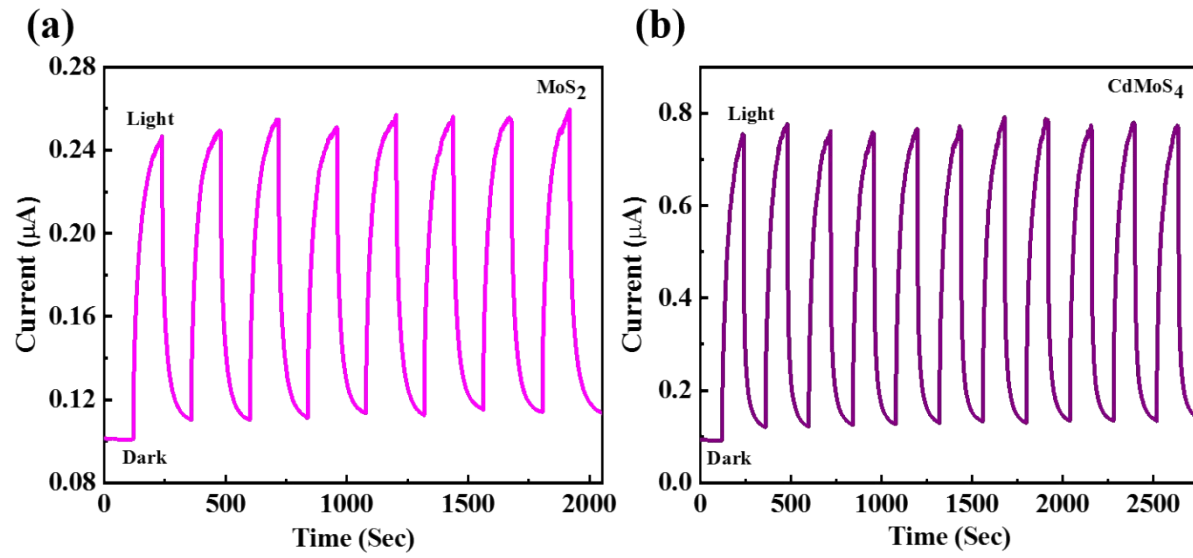

Fig. S4 Cyclic photo response study on (a) MoS<sub>2</sub> and (b) CdMoS<sub>4</sub> samples annealed at 400°C.

**Table. 1**

| Material                              | Spectral Range (nm) | Responsivity              | Response Time | Recovery Time | Ref       |
|---------------------------------------|---------------------|---------------------------|---------------|---------------|-----------|
| MoS <sub>2</sub>                      | 1550                | 47.5 mA/W                 | 10 ms         | 16 ms         | 2         |
| MoS <sub>2</sub> /Black Phosphorous   | 1550                | 153.4 mA/W                | 15 μs         | 70 μs         | 3         |
| Bilayer MoS <sub>2</sub>              | 1070                | 5.2 A/W                   | 44.5 s        | 404.7 s       | 4         |
| rGO/MoS <sub>2</sub>                  |                     | 2.1 A/W                   | 18 ms         |               | 5         |
| MoS <sub>2</sub>                      | 637                 | ~1 A/W                    | 64 μs         | 51 μs         | 6         |
| MoS <sub>2.19</sub>                   | THz radiation       | 10 mA/W                   | 5.12 s        | 6.33 s        | 7         |
| Few layer MoS <sub>2</sub>            | 532                 | ~20 mA/W                  | 12 s          | 19 s          | 8         |
| MoS <sub>2</sub> /CsPbBr <sub>3</sub> | 442                 | 4.4 A/W                   | 0.72 ms       | 1.01 ms       | 9         |
| MoS <sub>2</sub> /CdTe                | 780                 | 36.6 mA/W                 | 43.7 μs       | 82.1 μs       | 10        |
| MoS <sub>2</sub>                      | 365                 | 3 * 10 <sup>4</sup> A/W   | 32 ms         |               | 11        |
| MoS <sub>2</sub>                      | 385                 | 0.41 μAcm <sup>2</sup> /W | 118 s         | 123 s         | This work |
| CdMoS <sub>4</sub>                    |                     | 4 μAcm <sup>2</sup> /W    | 74 s          | 94 s          |           |

**Table 1:** Comparative photodetector performance of the MoS<sub>2</sub> and CdMoS<sub>4</sub> to the previously reported Mo based photodetector devices.

#### References:

- 1) Y. Son, Q. H. Wang, J. A. Paulson, C. J. Shih, A. G. Rajan, K. Tvrdy, S. Kim, B. Alfeeli, R. D. Braatz, and M. S. Strano, *ACS Nano* 2015, **9**, 2843.
- 2) Z. Huang, T. Zhang, J. Liu, L. Zhang, Y. Jin, J. Wang, K. Jiang, S. Fan, and Q. Li, *ACS Appl. Electron. Mater.* 2019, **1**, 1314.
- 3) L. Ye, H. Li, Z. Chen, and J. Xu, *ACS Photonics* 2016, **3**, 692.
- 4) W. Wang, A. Klots, D. Prasai, Y. Yang, K. I. Bolotin, and J. Valentine, *Nano Lett.* 2015, **15**, 7440.
- 5) R. Kumar, N. Goel, R. Raliya, P. Biswas, and M. Kumar, *Nanotechnology* 2018, **29**, 404001.
- 6) F. Gong, H. Fang, P. Wang, M. Su, Q. Li, J. C. Ho, X. Chen, W. Lu, L. Liao, J. Wang, and W. Hu, 2017. *Nanotechnology* 2017, **28**, 484002.
- 7) Y. Xie, F. Liang, S. Chi, D. Wang, K. Zhong, H. Yu, H. Zhang, Y. Chen, and J. Wang, 2020. *ACS Appl. Mater. Interfaces* 2020, **12**, 7351.

- 8) F. Yu, M. Hu, F. Kang, and R. Lv, *Prog. Nat. Sci.: Mater. Int.* 2018, **28**, 563-568.
- 9) X. Song, X. Liu, D. Yu, C. Huo, J. Ji, X. Li, S. Zhang, Y. Zou, G. Zhu, Y. Wang, and M. Wu, *ACS Appl. Mater. Interfaces* 2018, **10**, 2801.
- 10) Y. Wang, X. Huang, D. Wu, R. Zhuo, E. Wu, C. Jia, Z. Shi, T. Xu, Y. Tian, and X. Li, *J. Mater. Chem. C* 2018, **6**, 4861.
- 11) S. Kumar, A. Sharma, Y. T. Ho, A. Pandey, M. Tomar, A. K. Kapoor, E. Y. Chang, and V. Gupta, *J. Alloys Compd.* 2020, **835**, 155222.
